# Supplementary material
Source: publisher site journal article supplement (https://www.dovepress.com/article/293200)
Supplement: Supplementary file 1 [file get_supplementary_file.php]

Supplemental Table 1. Characteristics difference between groups

| Characteristics | Grade 3/4 irAEs (N=15) | Grade 1/2 irAEs (N=42) | Non-irAEs (N=93) | P |
| --- | --- | --- | --- | --- |
| Age, mean±SD | 58.9±9.8 | 57.3±10.0 |  | 0.70 |
| Sex  Male  Femal | 13  2 | 34  8 | 71  22 | 0.59 |
| BMI, mean±SD | 21.9±2.6 | 22.2±4.1 | 22.4±3.9 | 0.47 |
| Smoke habit(current or former) | 7 | 21 | 59 | 0.22 |
| Drink habit (current or former) | 4 | 17 | 20 | 0.08 |
| Histology |  |  |  |  |
| Adenocarcinoma | 9 | 19 | 35 | 0.22 |
| Squamous carcinoma | 6 | 22 | 58 |  |
| Clinical stage |  |  |  |  |
| IIIB | 6 | 17 | 30 | 0.60 |
| IV | 9 | 25 | 63 |  |
| ECOG PS score |  |  |  |  |
| 0-1 | 13 | 37 | 81 | 0.98 |
| 2 | 2 | 5 | 12 |  |
| PD-L1 |  |  |  |  |
| Not done | 7 | 34 | 63 |  |
| <1% | 3 | 2 | 10 |  |
| 1%-9% | 1 | 1 | 4 |  |
| 10%-49 | 1 | 2 | 5 |  |
| >50% | 1 | 3 | 14 |  |
| **Treatment** |  |  |  |  |
| anti-PD-1 combined with chemotherapy | 15 | 38 | 77 | 0.13 |
| anti-PD-1 monotherapy | 0 | 4 | 16 |  |

Supplemental table 2. Baseline peripheral blood markers between treatment naïve and prior treatment patients

| Characteristics | Treatment naive(N=74) | Prior treatment (N=76) | P |
| --- | --- | --- | --- |
| neutrophil | 4.52 (3.57-6.64) | 4.57 (3.18-6.10) | 0.59 |
| lymphocyte | 1.46 (1.03-1.83) | 1.03 (0.69-1.58) | 0.001 |
| platelet | 238 (213.50-239.50) | 257.50 (185.50-313.75) | 0.92 |
| NLR | 2.99 (2.33-5.20) | 4.30 (2.82-6.42) | 0.029 |
| PLR | 174.43 (124.01-236.04) | 228.82 (157.49-312.78) | 0.003 |
